1 **Title:** Directing Cholangiocyte Morphogenesis in Natural Biomaterial Scaffolds

2 **Authors:** Quinton Smith <sup>1,2</sup>, Christopher Chen <sup>3</sup>, Sangeeta Bhatia <sup>1,2,4</sup>

3 **Affiliations:** <sup>1</sup>. Howard Hughes Medical Institute, Chevy Chase, MD, 20815 USA. <sup>2</sup> David  
4 H. Koch Institute for Integrative Cancer Research, Massachusetts Institute of Technology,  
5 Cambridge, MA, 02142 USA. <sup>3</sup>. Department of Bioengineering, Boston University, Boston,  
6 MA, 02215 USA. <sup>4</sup>. Department of Electrical Engineering and Computer Science,  
7 Massachusetts Institute of Technology, Cambridge, MA, 02142 USA.

8

9 Corresponding Author: Sangeeta Bhatia

10

11 Address:

12 Koch Institute for Integrative Cancer Research

13 500 Main Street

14 Cambridge, MA 02142

15 Email: [sbhatia@mit.edu](mailto:sbhatia@mit.edu)

16

17 **ABSTRACT**

18

19 Patients with Alagille syndrome carry monogenic mutations in the Notch signaling  
20 pathway and face complications such as jaundice and cholestasis. Given the presence  
21 of intrahepatic ductopenia in these patients, Notch2 receptor signaling has been  
22 implicated in driving normal biliary development and downstream branching  
23 morphogenesis. As a result, *in vitro* model systems of liver epithelium are needed to  
24 further mechanistic insight of biliary tissue assembly. Here, we systematically evaluate  
25 primary human intrahepatic cholangiocytes as a candidate population for such a platform  
26 and describe conditions that direct their branching morphogenesis. We find that  
27 extracellular matrix presentation, coupled with mitogen stimulation, promotes biliary  
28 branching in a Notch-dependent manner. These results demonstrate the utility of using  
29 3D scaffolds for mechanistic investigation of cholangiocyte branching and provides a  
30 gateway to integrate biliary architecture in additional *in vitro* models of liver tissue.

31

32

## 33 INTRODUCTION

34

35 The liver is the largest internal organ in the body and is responsible for performing over  
36 500 different vital functions. These tasks include detoxifying drugs, storing nutrients, and  
37 producing essential factors such as albumin, clotting proteins, and bile. At a microscopic  
38 view, the liver organization consists of repeated hexagonal units termed hepatic lobules.  
39 These lobules contain sheets of hepatocytes, flanked by six portal triads, which are  
40 comprised of a network of portal veins, hepatic arteries, and intrahepatic bile ducts. In this  
41 triad, the vasculature is responsible for the transport of oxygen, nutrients, and clotting  
42 factors. The bile ducts, on the other hand, transport hepatocyte-secreted bile acid to the  
43 small intestine. Efforts to study liver biology benefit from *in vitro* model systems that  
44 recapitulate aspects of the tissue's native cellular composition and architecture. Existing  
45 liver tissue engineering strategies have successfully incorporated human vascular  
46 networks with primary hepatocytes *in vitro* [1-4]. However, cell sourcing remains a critical  
47 bottleneck in our ability to study human intrahepatic biliary biology. Coupled with this  
48 limitation, *in vitro* model systems of the biliary system primarily rely on rodent isolates [5],  
49 immortalized cell lines [6,7], or adult/pluripotent stem cell-derivatives [8-14]. These  
50 populations either do not display mature cholangiocyte marker expression or are limited  
51 to forming a non-perfusible structure that lacks the branched architectures found in the  
52 native liver.

53

54 Immortalized mouse hepatoblasts, with the capacity to differentiate into hepatocytes or  
55 cholangiocytes, have been shown to form cystic ductal structures in extracellular matrix  
56 (ECM) conditions that contain both laminin rich Matrigel and rat tail collagen I. This finding  
57 contrasts with other epithelia, such as Madin-Darby canine kidney cells (MDCK), which  
58 only require integrin engagement with collagen I motifs to polarize and expand as cysts  
59 [15]. Notably, when mouse hepatoblasts are cultured in collagen I, they form branch-like  
60 structures but are unable to polarize. Cystic efficiency in hepatoblast culture is dependent  
61 on EGF and HGF stimulation, as well as metalloproteinase and TGF $\beta$  activity [16].  
62 Consistent with these findings, immortalized progenitor-like small cholangiocytes derived

63 from mice cannot spread in collagen I matrices or form cystic structures in Matrigel but  
64 require decellularized liver ECM to undergo branching morphogenesis <sup>[17]</sup>. To reduce the  
65 complexity of xeno-derived matrices, synthetic hydrogel scaffolds can be engineered with  
66 specific material properties such as stiffness, porosity, and adhesion densities, permitting  
67 systematic decoupling of physicochemical cues necessary for tissue homeostasis and  
68 morphogenesis. For example, immortalized normal rat intrahepatic cholangiocytes  
69 (NRCs) <sup>[7]</sup> encapsulated in polyethylene glycol (PEG) pre-polymers that are functionalized  
70 with fibronectin-derived RGD binding motifs can expand as cysts in a stiffness-dependent  
71 manner. Soft (0.5 kilopascal) hydrogel matrices lead to frequent cyst formation, and  
72 increased RGD concentrations encourage multi-luminal features, but interconnected  
73 branched epithelial structures could not be generated <sup>[18]</sup>. Furthermore, a variety of  
74 approaches have been used to build perfusable biliary tubes, but the resulting channels  
75 lack hierarchical structure, and are composed of rodent-derived cholangiocytes <sup>[19,20]</sup>. To  
76 date, the vast majority of studies in this field have relied on rodent-derived cellular  
77 material, and there are many examples in the liver tissue engineering field in which  
78 findings obtained using mouse and rat cells do not correlate with the outcomes obtained  
79 with human samples <sup>[21–25]</sup>. While the advent of immortalized human biliary cell lines can  
80 help to reduce these variances, they present their own limitations, including a heavy  
81 mutational burden that can lead to clonal variability from the original source and  
82 transformation from the natural phenotype as in the case with hepatocytes <sup>[26]</sup>. Motivated  
83 both by these advances and the remaining progress gaps, we sought to build upon  
84 existing biliary platforms and investigated the potential to fabricate branched human  
85 cholangiocyte networks, alongside cholangiocyte-lined channels.

86  
87 To this end, we characterized commercially available adult-derived primary human  
88 cholangiocytes and investigated their branching potential in 3D culture conditions. First,  
89 we performed cellular profiling with biliary-specific surface markers and measured tissue-  
90 specific enzymatic activity. After validating cholangiocyte-like identity of these isolates,  
91 we conducted 3D culture experiments in natural biomaterial scaffolds containing varying  
92 concentrations of mitogens relevant to liver development and regeneration. From these  
93 studies, we found that growth factor cues and the extracellular matrix coax *in vitro* biliary

94 network assembly in a Notch signaling-dependent manner<sup>[1,27,28]</sup>. In addition, we  
95 demonstrate that branching architectures of this human cholangiocyte-like population are  
96 also supported in an engineered microfluidic platform that has been used previously as  
97 an organ-on-chip model system<sup>[1,27,28]</sup>. This finding highlights the potential to harness  
98 these primary human cells in this perfusable platform for future investigations of  
99 cholangiocyte functionality including permeability, shear stress response, and transport  
100 of bile fluid components such as cholic/chenodeoxycholic acids or xenobiotics.  
101 Collectively, our combined approaches reinforce the role of EGF stimulation and Notch  
102 signaling in biliary morphogenesis.

103

104

## 105 **RESULTS**

106

### 107 **Primary Intrahepatic Cholangiocytes Maintain Functional Marker Expression *In*** 108 ***Vitro***

109

110 Sourcing human primary cholangiocytes remains a challenge due to their intrahepatic  
111 localization, however pluripotent stem cell derivatives<sup>[10,29–31]</sup> or Lgr5+ enriched adult duct  
112 progenitor populations acquired from biopsied samples<sup>[9]</sup>, have been routinely used as  
113 model systems to date. While these sources permit the expansion of cholangiocyte-like  
114 cells as cystic organoids, their maintenance requires administration of a complex  
115 chemical milieu that maintains a stem-like state and does not promote the self-assembly  
116 of physiologically relevant branched architectures. Here, we appraised morphological  
117 and functional features of commercially available, adult intrahepatic biliary epithelial cells  
118 (IHCs) using a combination of tools including gene expression analysis, flow cytometry  
119 and immunofluorescence staining (Fig. 1A). Phenotypic assessment was performed on  
120 thawed biliary cells that were expanded on collagen type I coated plates for up to 4  
121 passages. We first performed flow cytometry analysis to assess the homogeneity of  
122 these cell populations, as well as the degree of mature protein marker expression. As  
123 expected, the majority of IHCs expressed biliary markers SRY-related HMG transcription  
124 factor 9 (SOX9), cytokeratin 7 (CK-7), cystic fibrosis transmembrane conductance

125 regulator (CFTR), and a subset were positive for epithelial cell adhesion molecule  
126 expression (EpCAM). In contrast with stem cell-derived sources, IHCs expressed low  
127 levels of the mature marker somatostatin receptor 2 (SSRT-2), a mediator of hormonal  
128 signals during digestion, and did not exhibit alpha-fetoprotein (AFP), a common marker  
129 expressed by progenitors (Fig. 1B).

130  
131 We observed that cultured IHCs exhibited polygonal morphology, with visible cell-cell  
132 adhesions (Fig. 1C). While IHCs initially grew as distinct patches with regular borders,  
133 after multiple passages they began to exhibit elongated and spindle-like morphologies,  
134 indicative of epithelial to mesenchymal transition, and acquired some fibroblastic features  
135 such as fibronectin deposition while maintaining a degree of junctional marker expression  
136 (Supplementary Fig. S1). Based on this observation, IHCs were not used for functional  
137 studies beyond five passages. Immunofluorescence microscopy was used to visualize  
138 the localization and expression of proteins common to epithelial and cholangiocyte  
139 identity, namely membrane bound cell-cell adhesion marker  $\beta$ -Catenin, cytoplasmic  
140 cytokeratin 19 (CK-19) and nuclear biliary markers hepatic nuclear factor - 1 $\beta$  (HNF-1 $\beta$ )  
141 and SOX9 (Fig. 1C). Zinc metalloenzymes alkaline phosphatase (ALP) and  $\gamma$ -glutamyl  
142 transpeptidase (GGT) are present in nearly all tissues but are enriched in biliary  
143 epithelium *in vivo* and we observed that this population of IHCs demonstrate these  
144 functional features (Fig. 1C, D; Supplementary Fig. S1). Through the collective analysis  
145 of protein expression and enzymatic activity, we presume that the IHC population consists  
146 mainly of large rather than small cholangiocytes, evidenced by CFTR expression and  
147 GGT and ALP activity <sup>[32]</sup>.

148

149

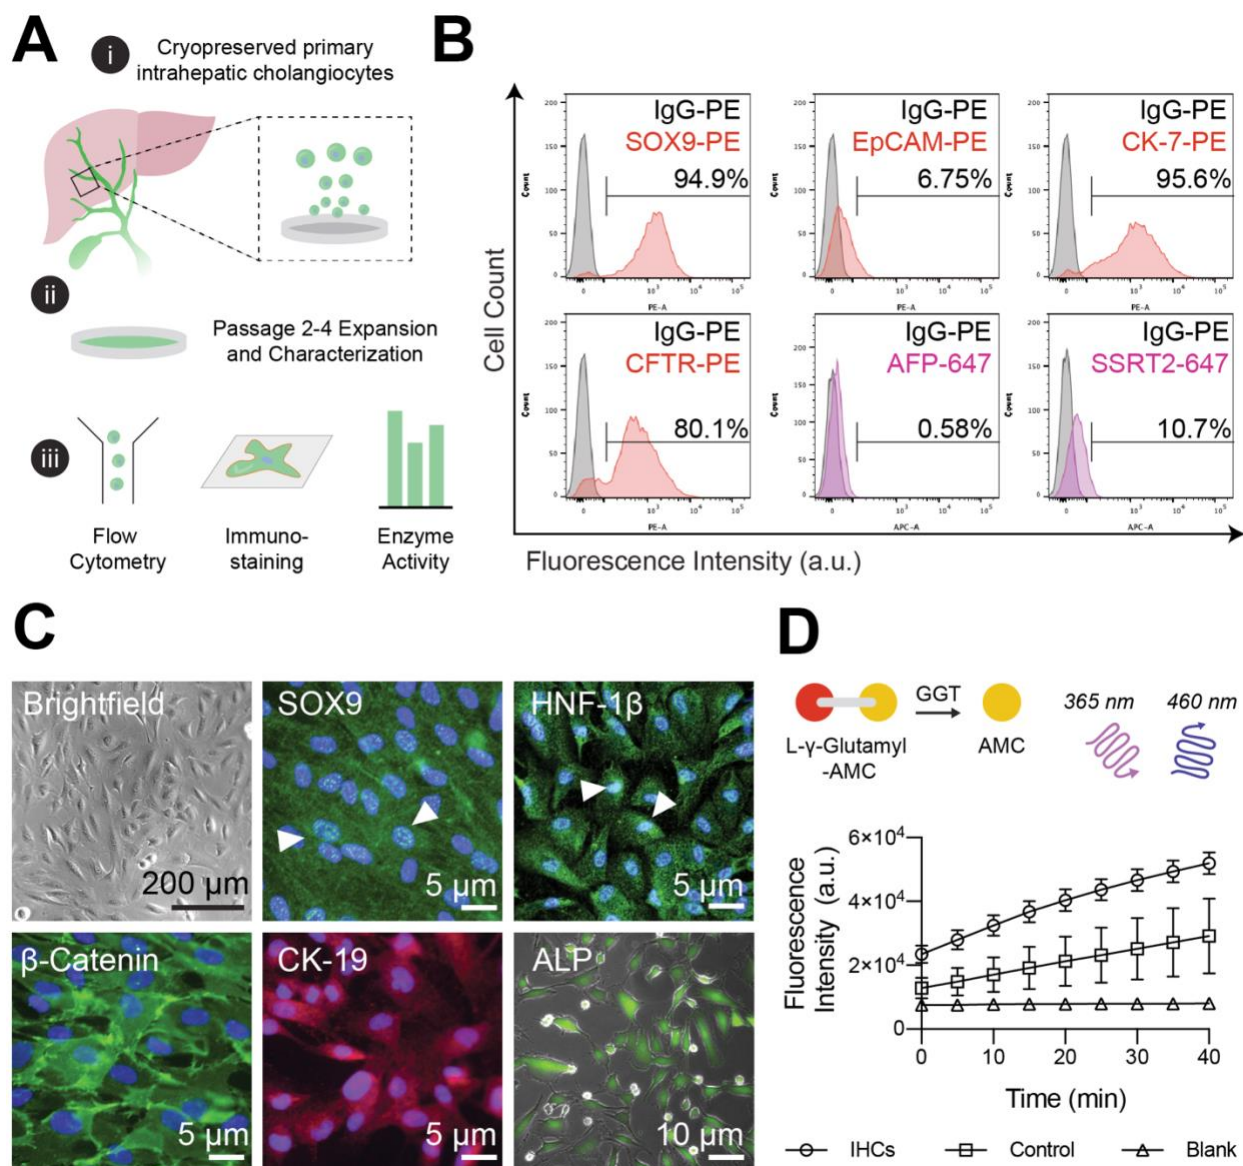

150  
151 **Figure 1. Characterization of primary intrahepatic cholangiocytes.** (A) (i) Schematic  
152 describing the approach to characterize adult, cryopreserved primary human intrahepatic  
153 cholangiocyte (IHCs); (ii) IHCs were expanded on collagen-coated plates and used for up  
154 to four passages; (iii) Passage 2 IHCs were characterized with a combination of flow  
155 cytometry analysis, immunofluorescence staining, and enzymatic activity assays. (B)  
156 Representative flow cytometry histogram plots showing SOX9, EpCAM, CK-7, CFTR,  
157 AFP and SSRT2 expression compared to IgG isotype controls (in gray; [n = 3]). (C)  
158 Representative brightfield and epi-fluorescence images of IHCs cultured on collagen-  
159 coated substrates (n = 3 biological replicates). IHCs show nuclear localization of SOX9  
160 and HNF-1β expression (green signal overlapping with nuclear DAPI stain in blue; white  
161 arrows), and positive cytoplasmic expression of β-catenin (green) and CK-19 (red). IHCs  
162 were incubated with a live alkaline phosphatase (ALP) stain for 30 minutes, washed with  
163 serum-free media and imaged with fluorescence microscopy (Nuclei were stained with  
164 DAPI). (D) γ-glutamyl transferase activity (GGT) measured using a colorimetric assay

165 where time course of fluorescence intensities is shown, denoting the liberation of 7-  
166 Amino-4-Methyl Coumarin (AMC) from a  $\gamma$ -glutamyl quenched substrate. Graphs  
167 represent mean and standard deviation from technical triplicates with blank and GGT  
168 positive controls.  
169

## 170 **Composite Extracellular Matrices Promote Cholangiocyte Branching in 3D Culture**

171  
172 After validating that IHCs exhibit a collective set of phenotypic and functional traits, we  
173 proceeded to leverage insight from *in vivo* developmental studies to assay whether these  
174 cholangiocyte-like cells can self-assemble into biliary networks *in vitro*. We hypothesized  
175 that IHCs would have the ability to form interconnected 3D branched network structures  
176 within a native extracellular niche, given the appropriate introduction of matrix and  
177 chemical cues. To this end, we first fluorescently labeled IHCs using a puromycin-  
178 selective lentiviral red fluorescent protein (RFP) system, designed to visualize live F-actin  
179 expression. Next, after selection via antibiotic resistance, we expanded and  
180 encapsulated the resulting Life-Act RFP-IHCs at a density of  $1 \times 10^6$  cells/mL in either  
181 Matrigel or Matrigel/ collagen type 1 blends. Four days post encapsulation, we fixed and  
182 labeled the nuclei of resulting structures, imaged using confocal microscopy, and  
183 performed image analysis on z-plane maximum intensity projections. To evaluate the  
184 resulting morphological features, we used a computer algorithm to segment image  
185 attributes and quantified network coverage, branch points, and structure lengths (Fig. 2A).  
186

187 IHCs that were encapsulated in growth factor-reduced Matrigel were incubated with or  
188 without EGF stimulation and exposed to conditions with L-685,458, a potent and selective  
189  $\gamma$ -secretase inhibitor that blocks Notch transcriptional activity [33]. IHCs cultured in pure  
190 Matrigel scaffolds without EGF stimulation produced limited sprouting and formed large  
191 aggregate structures, with multiple branched features extending from the clustered core.  
192 With Notch inhibition, cell aggregation diminished, indicative of increased matrix  
193 interaction compared to homotypic cell-cell interactions. However, multi-cellular  
194 branched features were not identified (Supplementary Fig. S2). Sprouting behavior in  
195 Matrigel improved in the presence of 20 ng/mL EGF, demonstrating the role of mitogen  
196 stimulation on biliary branching in laminin rich matrices (Supplementary Fig. S2).

197  
198 We hypothesized that the addition of fibrillar architecture within Matrigel could promote  
199 biliary sprouting behavior. Therefore, we created composite gels consisting of Matrigel  
200 and 3.0 mg/mL rat tail collagen type I and assessed IHC sprouting behavior under EGF  
201 stimulation and Notch inhibition. While there were no significant differences in the number  
202 of branch points, branch length, or percent coverage of IHCs cultured in 3D composite  
203 gels with 0 ng/mL EGF with or without Notch inhibition, we found that the addition of 20  
204 ng/mL EGF had a significant impact on the potential to form interconnected branched  
205 features. Notably, we observed an increase in the density and number of observed  
206 branched points (Fig. 2B i, ii). We also evaluated the combinatorial role of co-  
207 administering hepatocyte growth factor (HGF) with EGF on IHC branching potential, as  
208 they both have been implicated in inducing ductal morphogenesis during development  
209 (Supplemental Fig. S3A). We found that HGF alone can also support IHC sprouting, but  
210 the combination with HGF and EGF leads to densely interconnected structures. Again,  
211 when Notch inhibition is introduced, the additive effects of HGF and EGF are abrogated,  
212 implicating a strong role for Notch signaling in branching morphogenesis (Supplemental  
213 Fig. S3B, C).

214  
215 We next appraised network functionality through analysis of ATP-dependent flux. The  
216 multidrug resistance 1 (MDR1) P-glycoprotein protects cholangiocytes from toxic cationic  
217 agents present in hepatocyte-secreted bile acid, including xenobiotic substances or  
218 drugs. Rhodamine 123 is a fluorescent tracer dye and substrate of MDR1 and is actively  
219 transported into the lumen of biliary epithelial cells. 3D incubation of Rhodamine 123 in  
220 20 ng/mL EGF-stimulated networks led to secretory functionality, with a luminal influx of  
221 the fluorescent substrate (Fig. 2C). We were also able to identify lumen within the  
222 branching cholangiocytes using high-resolution confocal microscopy (Fig. 2D). For a  
223 controlled evaluation of the role of growth factor presentation during IHC branching, we  
224 chose to specifically look at EGF stimulation in 3D culture conditions, but also compared  
225 these effects to IHCs cultured as 2D monolayers (Supplementary Figure S4). To  
226 elucidate the effects of EGF on known Notch signaling targets, IHC transcript levels were  
227 measured in 3D composite gels cultured with 0, 20, or 50 ng/mL EGF. Our analysis



228 revealed that EGF stimulation affected *GGT*, *JAG1*, *NOTCH2*, and *HES1* mRNA  
229 expression levels in a dose-dependent manner and elicited a significant increase in  
230 *NOTCH2* gene expression with 20 ng/mL EGF stimulation (Fig. 2E).

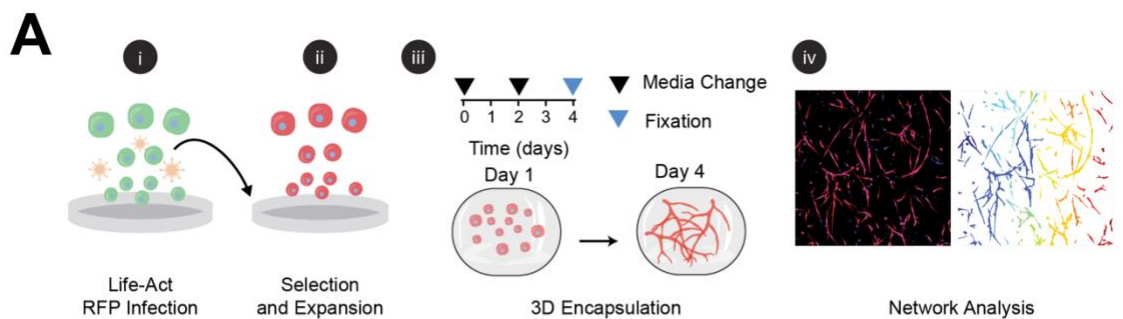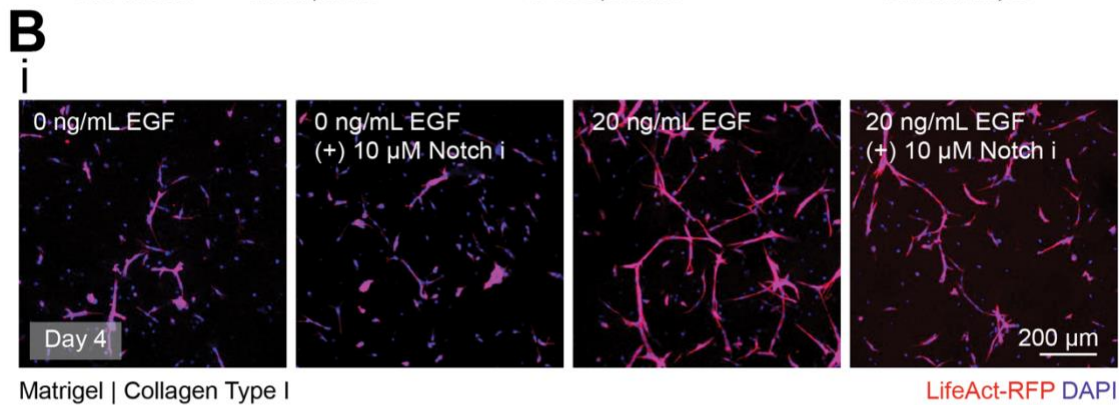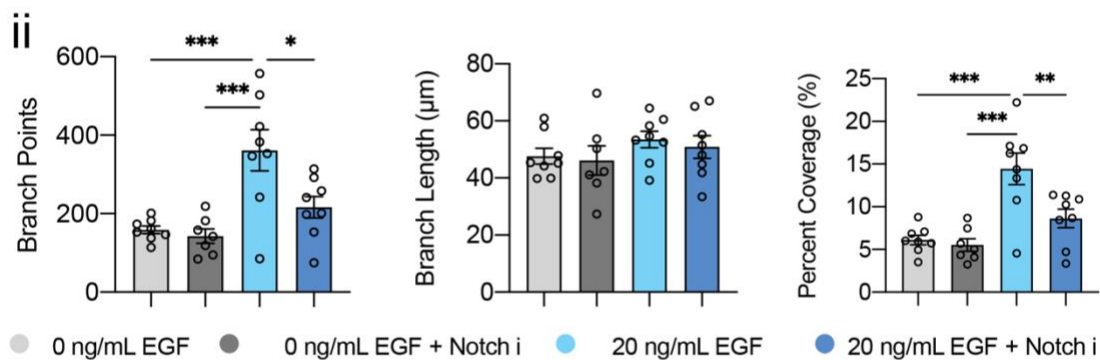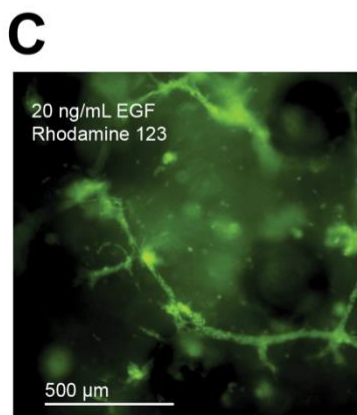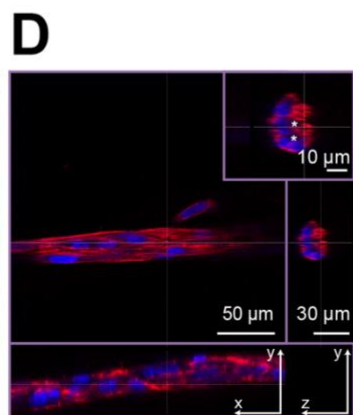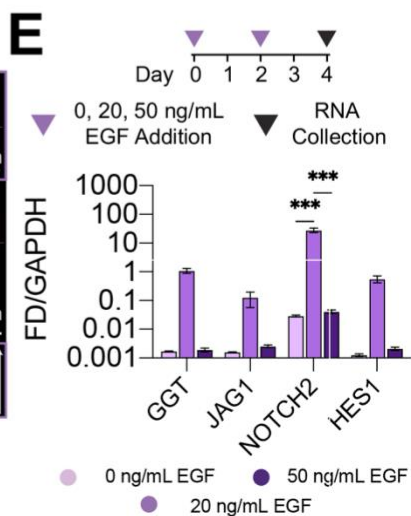

Matrigel | Collagen Type 1

232 **Figure 2. Composite Matrigel and Collagen Type I Gels Support Cholangiocyte**  
233 **Branching Morphogenesis. (A)** Experimental schematic to probe the capacity for  
234 primary human intrahepatic cholangiocytes to undergo branching morphogenesis: (i)  
235 Fluorescence tagging of IHCs by rLVUbi-LifeAct-TagRFP cytoskeletal labeling; (ii) A  
236 homogenous population of IHCs stable for red fluorescence protein (RFP) expression of  
237 F-actin was generated after puromycin selection and expanded in cholangiocyte media;  
238 (iii) Resulting populations were encapsulated in Matrigel/collagen type 1 gels for four  
239 days, and (iv) features of branching morphologies were measured from maximum  
240 intensity z-projections of confocal images using a segmentation algorithm. **(B)** (i)  
241 Representative images of LifeAct RFP-IHCs encapsulated in Matrigel/Collagen I blends,  
242 cultured with and without EGF or Notch inhibition (10  $\mu$ M L,685,458). (ii) Individual data  
243 points of quantified branch length, points, and network percent coverage. P-values were  
244 obtained using One-Way ANOVA Tukey's hypothesis testing. Representative images  
245 generated from at least 7 independent fields of view from 3 biological replicate  
246 experiments. At least 20 segmented features were analyzed per field of view. **(C)**  
247 Functional uptake of Rhodamine 123 after 4 days of IHC culture in Matrigel/collagen type  
248 1 blends containing 20 ng/mL of EGF. **(D)** F-actin stain of cholangiocytes grown in  
249 Matrigel/collagen type 1 composites after 4 days with 20 ng/mL EGF stimulation. White  
250 asterisks in the cross-section indicate lumen within the branched structures **(E)** mRNA  
251 expression levels of *GGT* and Notch signaling genes measured via RT-qPCR for IHCs  
252 four days post 3D culture. Bar graphs show internal triplicate measurements from the  
253 pooled collection of 5 biological replicate gels. P-values were obtained using Two-Way  
254 ANOVA Tukey's hypothesis testing.  $P < 0.033$  (\*),  $P < 0.002$  (\*\*),  $P < 0.001$  (\*\*\*). All data  
255 represented as mean  $\pm$  SEM.  
256

## 257 **EGF Stimulation Enhances Notch Signaling During Cholangiocyte Branching**

258  
259 We engineered Notch2-deficient cells using CRISPR/Cas9 (Clustered Regularly  
260 Interspaced Short-Palindromic Repeats/ CRISPR associated protein 9) mediated deletion  
261 to further validate EGF's role in Notch signal transduction and IHC branching potential.  
262 In brief, two guide RNAs (gRNAs; Scramble control, and Notch2) were cloned into  
263 puromycin-sensitive lentiviral CRISPR/Cas9 vectors and packaged with HEK293 cells.  
264 The resulting complexed particles were used to infect freshly thawed IHCs (Fig. 3A).  
265 Relative protein levels of the Notch2 intracellular domain (Notch2-ICD) were confirmed  
266 via western blot analysis of cell lysates, showing decreased expression in Notch2  
267 knockdown (KD) compared to scrambled control cells (Fig. 3B). These changes were  
268 consistent at the mRNA level (Fig. 3C), reflecting a broad uptake of the CRISPR-mediated  
269 deletion, despite some residual, Notch2-intact cells remaining in the population. Finally,  
270 cells from the control and Notch2 depleted populations were encapsulated in

271 Matrigel/collagen type 1 composite gels with 20 ng/mL EGF stimulation. After 4 days, the  
272 Notch2-depleted population exhibited dramatically blunted sprouting potential, relative to  
273 the scrambled control cells (Fig. 3D). These results confirm the role of EGF in the Notch  
274 signaling axis in IHCs, which presumably mediates branching morphogenesis in  
275 composite natural scaffolds.  
276

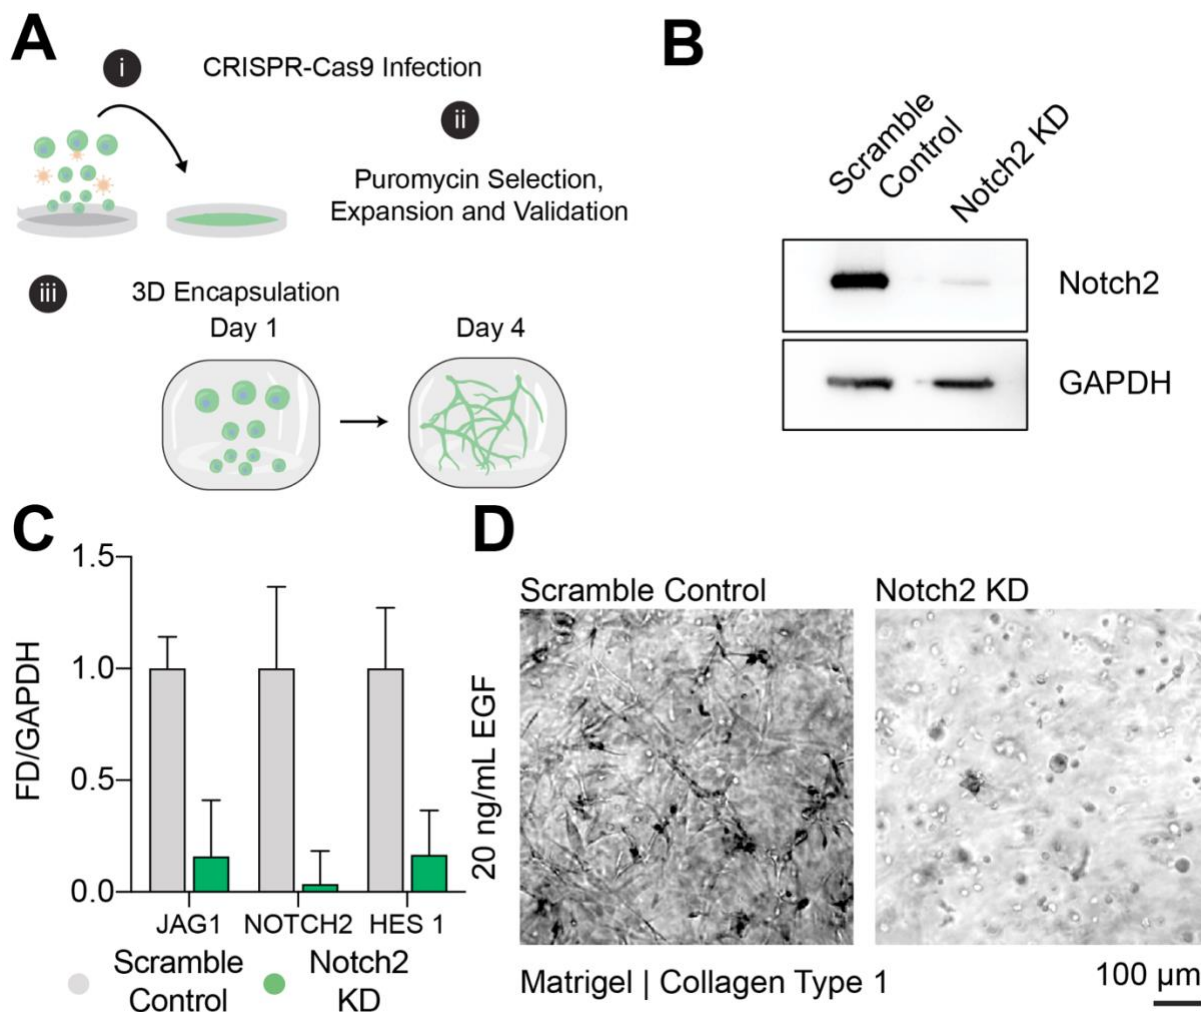

277  
278 **Figure 3. CRISPR-Cas9 Mediated Notch2 Knockdown Ablates Cholangiocyte**  
279 **Branching Morphogenesis in Hydrogel Blends. (A)** Schematic of the workflow to test  
280 the impact of Notch2 knockdown in cholangiocyte branching morphogenesis. **(B)** Notch  
281 2 intracellular domain (Notch 2 – ICD) downregulated protein expression in Notch 2  
282 knockdown (KD) IHCs compared to scramble control cells. **(C)** Comparison of mRNA  
283 expression between scramble control and Notch2 KD cells. Notch2 KD cells show  
284 downregulation of *JAG1*, *NOTCH2*, and *HES1* gene expression compared to scramble  
285 controls (n = 2). **(D)** Brightfield images of scramble control and Notch2 KD cells grown in

286 Matrigel/ collagen I hydrogel blends after four days. Notch2 KD cholangiocytes show  
287 blunted branching compared to control cells (n=3, triplicate gels).  
288

## 289 **Intrahepatic Biliary Tree on a Microfluidic Chip**

290  
291 To demonstrate IHC sprouting potential in a system amenable to flow, which allows the  
292 study of biliary phenotypes in a dynamic, physiologically relevant microenvironment, we  
293 leveraged a previously developed microfluidic platform <sup>[27,34]</sup>. In brief, the  
294 polydimethylsiloxane (PDMS)-based device contains guide features when bonded on a  
295 coverslip, allowing for the insertion of parallel needles (300  $\mu$ m in diameter, spaced 1 mm  
296 apart). Subsequent to needle insertion, prepolymer solutions with or without cells can be  
297 introduced within the device. After the polymer has crosslinked, needle removal leaves  
298 open structures that can be seeded with cells, allowing for bulk cellular self-assembly and  
299 prefabricated vessel-shaped structures (Fig. 4A). We first leveraged insight from our bulk  
300 3D culture experiments, and mixed IHCs in pre-polymerized composite gels into the  
301 device. Following polymerization and needle removal, we seeded additional IHCs into  
302 the lumen of the channels via a pressure differential and cultured the devices under  
303 gravity-driven perfusion using a rocker platform. After monitoring RFP expression over  
304 the course of 6 days, we found that the vessel structures collapsed into cords, blunting  
305 channel access for perfusion, but permitted the assembly of branching architectures in  
306 the bulk of the device (Fig. 4B). When comparing this observed phenotype to microfluidic  
307 culture of normal rat cholangiocytes (NRCs), we found that Matrigel/collagen blends  
308 supported both bulk cystic morphogenesis and sustained polarized cell-laden channels  
309 as previously described (Supplementary Figure S5)<sup>[19]</sup>. NRC culture inside the fluidic  
310 channels phenocopies the epithelial polarization we expect in normal biliary epithelium,  
311 including strong junctional marker expression. However, to maintain patent vessel  
312 architecture with the IHCs, we explored the use of alternative biomaterial scaffolds. We  
313 found that fibrin, a sticky clotting agent comprised of fibrinogen and thrombin, enhanced  
314 biomaterial adhesion to the glass and PDMS features of the device, sustaining both  
315 patent cholangiocyte-lined ducts as well as dense, interconnected branched features (Fig.  
316 4C). Collectively, these results demonstrate the capacity to form a biliary tree on a  
317 microfluidic chip that is amenable to the introduction of flow.

318

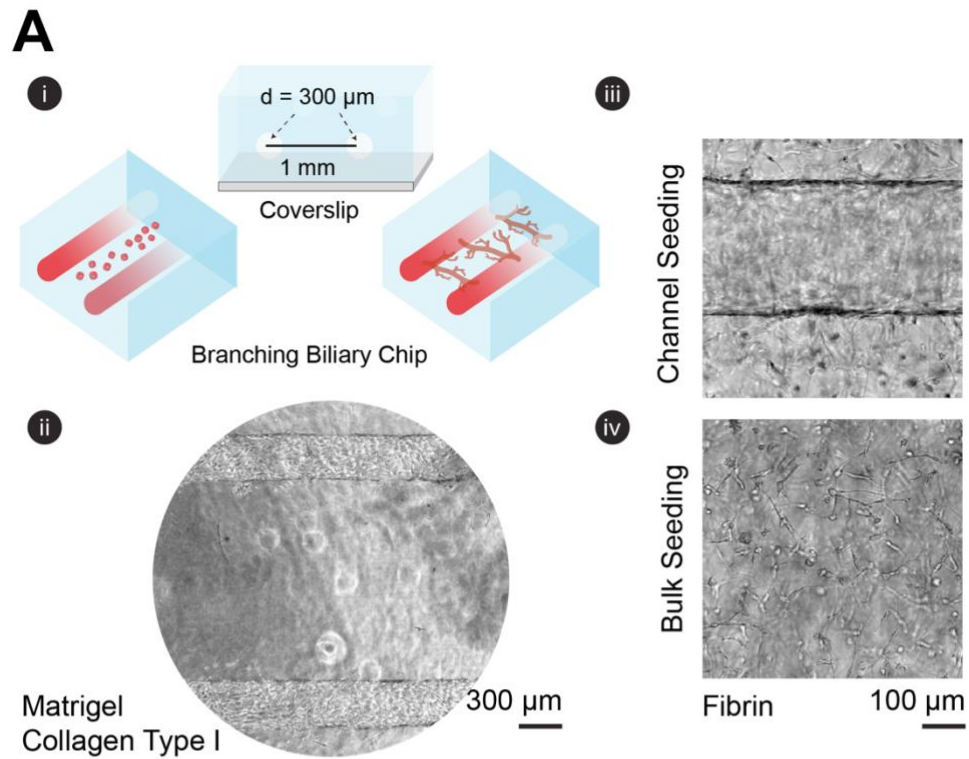

**B**

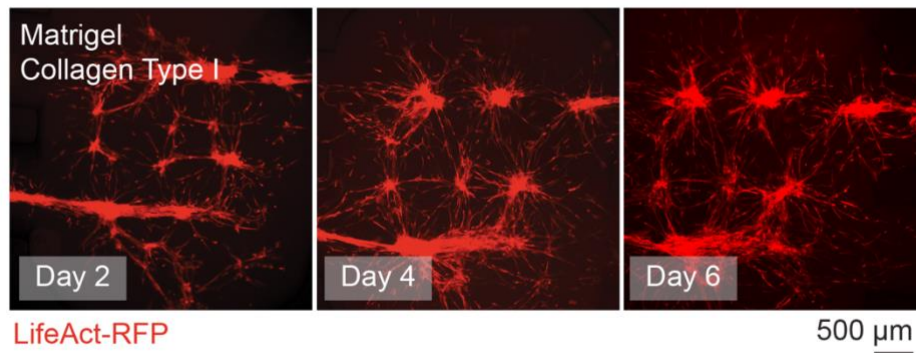

**C**

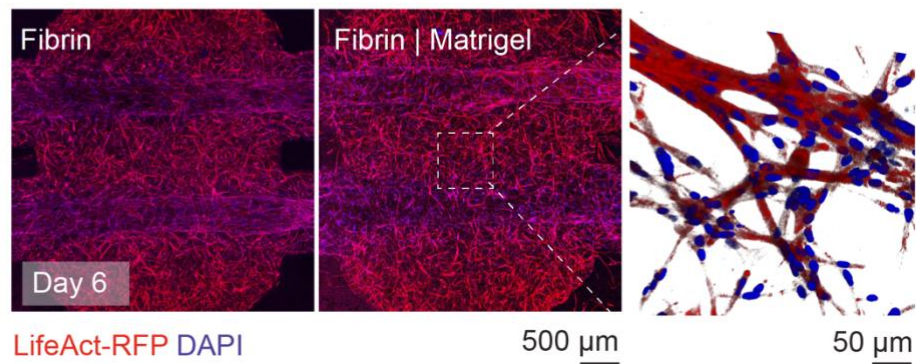

319

320 **Figure 4. Hierarchical Intrahepatic Biliary Duct on a Chip. (A)** (i) Device schematic  
321 and representative brightfield images, showing top and cross-sectional views of a dual  
322 channel microfluidic platform; (ii) encased within the biomaterial scaffolds are two parallel  
323 300  $\mu\text{m}$  open luminal structures spaced 1 mm apart; (iii) the arrangement provides  
324 capacity to seed IHCs and flow media in the patent channels; (iv) and encapsulate IHCs  
325 in the bulk compartment of the device. **(B)** Representative time course images of LifeAct  
326 RFP-IHCs grown in microfluidic device with 20 ng/mL EGF, showing collapse of open  
327 structures after six days, but anastomosis between bulk networks with channel structures.  
328 **(C)** Representative maximum intensity projection images of LifeAct RFP-IHCs cultured  
329 for 6 days with 20 ng/mL EGF in fibrin scaffolds, showing maintenance of open cell-laden  
330 channels compared to Matrigel/collagen type 1 scaffolds (Nuclei stained with DAPI).

331

## 332 **DISCUSSION**

333

334 Here we describe a pipeline for characterizing primary human biliary isolates and  
335 appraised their functional and morphogenic potential under controlled *in vitro*  
336 microenvironments. We specifically show that extracellular matrix composition, growth  
337 factor presentation, and Notch activity elicit the self-assembly of branched epithelial  
338 structures that mimic native biliary tissue. The resulting structures maintain  
339 cholangiocyte-specific function and are able to transport multiple drug resistance protein  
340 substrates. Furthermore, we successfully combined top-down and bottom-up  
341 approaches to engineer large (300  $\mu\text{m}$ ) cholangiocyte-lined channels as well as smaller  
342 self-assembled branched cholangiocyte networks in a microfluidic platform. We envision  
343 that this engineered 'chip' format can be leveraged for future evaluation of shear stress,  
344 permeability, and spatially organized co-cultures. Collectively, these results reinforce  
345 approaches that can be used to study cell-cell and cell-matrix during tissue  
346 morphogenesis and provides a strategic framework for future integration of biliary  
347 epithelium in existing engineered liver platforms <sup>[35,36]</sup>.

348

349 Notch signaling is an evolutionarily conserved intracellular pathway that regulates many  
350 aspects of embryonic development including cell-fate specification and morphogenesis.  
351 Consequently, dysregulation of Notch signaling can lead to an array of developmental  
352 disorders that affect many tissues including the liver. Mammalian cells contain four  
353 different single pass transmembrane Notch receptors (NOTCH 1-4). Upon ligand  
354 engagement by neighboring Jagged or Delta-like protein expressing cells, the

355 extracellular domain of the Notch receptor undergoes proteolytic cleavage by an ADAM  
356 metalloprotease. Following this reaction, cleavage of the Notch intracellular domain  
357 (NICD) by  $\gamma$ -secretase, liberates the protein to translocate to the nucleus where it interacts  
358 with the recombination signal binding protein for immunoglobulin kappa J (RBPJ)  
359 transcription factor. This association promotes downstream expression of hairy and  
360 enhancer of split-1 (HES1) which acts to confer instructions to neighboring cells during  
361 embryonic patterning. Notch signaling is essential to bile duct specification and  
362 subsequent tubule formation [37], and patients with Alagille syndrome, contain inherited  
363 mutations in either the Notch2 receptor or Jag1 ligand resulting in cholestasis from ductal  
364 paucity[38]. Kitade et al. show mouse derived bipotential hepatic progenitor cells (HPCs)  
365 undergo cholangiocyte specification and branching morphogenesis in Matrigel/collagen I  
366 gels. This branching is mediated by EGFR and MET stimulation using EGF and HGF  
367 media supplementation, respectively. *EGFR* null HPCs are unable to undergo branching  
368 morphogenesis or acquire biliary marker expression upon growth factor addition [39].  
369 Furthermore, *EGFR* competent HPCs with Notch deletion fail to differentiate or branch  
370 with MET/EGFR activation. In line with these results, our human *in vitro* system  
371 corroborates the crosstalk between Notch/EGF (EGFR) signal transduction in biliary  
372 morphogenesis [37,40].

373  
374 We show that inhibition of  $\gamma$ -secretase by L-685,458 or knockdown of Notch2 via  
375 CRISPR/Cas9, leads to reduced branching morphogenesis *in vitro* and abrogates  
376 transcriptional activation of *HES1*. Furthermore, we find that EGF stimulation during  
377 branching morphogenesis is correlated with increased Notch signal transduction,  
378 evidenced by the upregulation of *HES1*. We find that this transcriptional regulation of  
379 Notch activity is specific to 3D culture conditions. Whether this phenotype is regulated by  
380 ECM stiffness has yet to be elucidated, but mechanical forces have been demonstrated  
381 to regulate YAP/TAZ control of Notch activation in epidermal stem cells [41]. Additionally,  
382 bi-potent mouse hepatoblasts have been shown to preferentially differentiate into  
383 cholangiocytes at the periphery of circular micropatterned domains. Compared to central  
384 areas, these regions elicit increased actomyosin stress and elevate *NOTCH2* and *JAG1*  
385 transcriptional activity [42]. Applying these principles to our system, we stipulate that



386 rheological characterization of our optimized matrices will provide additional insight into  
387 the role of scaffold mechanics on Notch-mediated morphogenesis.

388  
389 Aside from standardizing media components, differences in the described morphogenic  
390 potential of varying cholangiocytes should be reconciled by transcriptional profiling, which  
391 allows for stratification of specie specific phenotypes. In addition, single cell analysis can  
392 illuminate functional differences between stem cell-derived, adult progenitor and small/  
393 large cholangiocyte subtypes<sup>[43]</sup>. Finally, while immortalized cell lines have proven useful  
394 for *in vitro* mechanistic studies, questions regarding their phenotypic stability,  
395 tumorigenicity and transcriptional landscape remain, limiting their clinical utility for  
396 regenerative medicine applications. Our system provides an important framework for  
397 directing primary human biliary assembly that can be integrated with existing approaches  
398 in liver tissue engineering. There are notable limitations in this system, including the need  
399 for further functional validation of the cholangiocyte-like cells used in this study. For  
400 example, optimization of culture conditions should be conducted to limit mesenchymal  
401 features after serial passage and investigation of other markers such as the sodium-  
402 dependent bile acid transporter (ASBT) and osteopontin (OPN) should be pursued. With  
403 this described microfluidic system, one can measure cholangiocyte permeability,  
404 response to small molecules (ATP and acetylcholine stimulation on calcium influx  
405 dynamics), shear stress, and varying bile compositions. While we demonstrate the role  
406 of EGF stimulation on Notch signaling, other signal transduction pathways such as  
407 PI3K/Akt and MEK/ERK intracellular pathways can be affected by EGF as well.  
408 Furthermore, tethering EGF ligands to the scaffolds, rather than bulk administration, could  
409 lead to enhanced signal transduction and morphogenetic processes<sup>[44]</sup>. In summary, we  
410 provide insight into growth factor-mediated branching in liver epithelium, consistent with  
411 findings in lung or kidney morphogenesis, but unveil tissue-specific ligand-receptor  
412 feedback between EGF and Notch signaling. Leveraging this insight, we directed the  
413 assembly of biliary duct structures using a microfluidic platform, adding a new model  
414 system of the portal triad.

415

416

417 **ACKNOWLEDGEMENTS**

418

419 This work was supported by an NIH (EB008396) and the Howard Hughes Medical  
420 Institute (HHMI). Q.B.S is an HHMI Hanna Gray Fellow and S.N.B. is an HHMI  
421 investigator. We would like to specifically thank Dr. Heather Fleming for the critical editing  
422 of the manuscript. Dr. William Polacheck, Juliann Tefft, and Amy Stoddard provided  
423 technical support for the described microfluidic devices. We would also like to thank Dr.  
424 Jennifer Bays for performing the western blots, providing the CRISPR/Cas9 reagents,  
425 and giving technical assistance. Finally, we thank Dr. Amanda Chen, Dr. Tiffany Vo, Dr.  
426 Arnav Chhabra, and Keval Vyas for their technical advice and discussions throughout the  
427 project. This work is supported in part by the Koch Institute Support (core) Grant P30-  
428 CA14051 from the National Cancer Institute and the Koch Institute Swanson  
429 Biotechnology Center for technical support, specifically through the microscopy and flow  
430 cytometry core facilities.

431

432

## 433 **MATERIALS AND METHODS**

434

435 **Primary Human Biliary Epithelial Cell Culture.** Human intrahepatic biliary epithelial  
436 cells (IHCs) passage 1-5 (ScienCell, Carlsbad, CA) were cultured in complete epithelial  
437 growth media (ScienCell) on 50 µg/mL type I collagen coated surfaces (Corning). IHCs  
438 were isolated from human liver tissue using mechanical dissociation and enriched for CK-  
439 19. Media was exchanged every two to three days, passaged at 80% confluency with  
440 0.05% trypsin/EDTA (ThermoFisher Scientific, Waltham, MA), and maintained in a  
441 humidified 5% CO<sub>2</sub> incubator at 37°C.

442

443 **Flow Cytometry.** Marker expression was verified through cytometry, where PE or APC-  
444 conjugated antibodies were stained on fixed and permeabilized cells. To harvest cells for  
445 flow analysis, serum was removed prior to adding TrypLE (Invitrogen, Waltham, MA)  
446 dissociation buffer, by washing with 1x PBS. After collection, cells were fixed with 3.7%  
447 paraformaldehyde (PFA) for 5 minutes, spun for 2 minutes at 200xG, and resuspended in  
448 0.1% Triton X for 10 minutes. Cells were then incubated in 100 µl of 0.1% bovine serum  
449 albumin (BSA; Sigma-Aldrich, St. Louis, MO) in PBS with conjugated antibodies for 1 hour  
450 at room temperature. Cells were washed three times to reduce non-specific staining and  
451 analyzed on a BD LSRFortessa (BD Biosciences, Franklin Lakes, NJ). To determine  
452 levels of expression, all analyses were conducted using IgG-PE or IgG-APC (BD) isotype  
453 controls.

454

455 **Immunofluorescence Staining and Imaging.** Cells cultured on glass collagen I  
456 coverslips, were washed with 1X PBS and fixed in 3.7% paraformaldehyde for 10  
457 minutes. After washing the samples with 1X PBS, samples were incubated in 0.1% Triton  
458 X-100 (Sigma-Aldrich) for 10 minutes. Next, cells were washed with 1X PBS and  
459 incubated for 1 hour at room temperature in 1% BSA to block for non-specific binding.  
460 Samples were then incubated with primary antibodies diluted in 1X overnight at 4°C,  
461 washed with incubated with secondary antibodies for 1 hour at room temperature. Finally,  
462 samples were incubated with Hoechst solution (ThermoFisher) for 3 minutes and washed

463 with PBS prior to imaging. Cell morphology was identified using a Nikon TE200 Inverted  
464 microscope.

465  
466 **Biochemical Assays.**  $\gamma$ -Glutamyl Transferase activity was acquired using the  
467 Colorimetric Assay Kit (Sigma-Aldrich). In brief, 1 million, IHCs and fibroblast controls  
468 were collected in microcentrifuge tubes. Cells were pelleted by spinning down at 200 x G  
469 for 3 minutes. After aspirating out the supernatant, cells were resuspended in 200  $\mu$ l of  
470 cold GGT Assay Buffer and spun at 13,000 x G for 10 minutes. Activity was acquired  
471 through kinetic absorbance measurements (418 nm) at 37°C using a TECAN Infinite  
472 microplate reader. To determine alkaline phosphatase (ALP) activity, growth media of  
473 live cell cultures was removed, prior to washing vessels with pre-warmed DMEM/F-12.  
474 Adherent cells were then incubated for 20-30 minutes with a 1X ALP Live Stain solution  
475 (ThermoFisher). After incubation, the ALP solution was removed, and cultures were  
476 washed two times with fresh DMEM/F-12 for 5 minutes per wash prior to imaging using  
477 FITC illumination.

478  
479 **Biliary Network Formation.** Collagen gels were formed as previously described. In brief,  
480  $1.0 \times 10^6$  cells/mL were encapsulated in gels composed of Matrigel mixed at equal parts  
481 with 3.0 mg/mL rat tail collagen type I, that was titrated to pH 7.0-7.5 with 1M NaOH. 100  
482  $\mu$ l of the collagen mixture was added to wells of a 96 well plate and allowed to polymerize  
483 at 37°C for 30 minutes. After the gel solidified, an additional 100  $\mu$ l of supplemented  
484 epithelial media was added.

485  
486 **Biliary Network Quantification.** A custom image processing program was written in  
487 MATLAB (Natick, MA) to quantify morphological features of branching phenotypes.  
488 Maximum intensity projections of confocal z-stacks were processed using ImageJ (NIH).  
489 Next, images were exported as JPEG files and imported into MATLAB. Red fluorescent  
490 protein (RFP) signal was used to identify network features. Masked image segments  
491 were enumerated and evaluated for percent coverage, branch length, and branch points.

492

493 **Quantitative Reverse-Transcription PCR.** Total RNA was extracted using TRIzol  
494 Reagent (Invitrogen) from IHCs cultured under varying conditions. Quality and quantity  
495 of extracted RNA was verified by NanoDrop spectrophotometry prior to implementation  
496 of the 1 step RNA to Ct kit (ThermoFisher). Each measurement was conducted in  
497 triplicate with non-template controls using a BioRad CFX96 instrument. GAPDH served  
498 as endogenous controls for global normalization to acquire mRNA expression. Reference  
499 groups for differential analysis are outlined in the text and fold differences were calculated  
500 by the comparative Ct method.

501  
502 **Lentiviral-Mediated CRISPR Genome Editing.** CRISPR knockdown cells were  
503 generated using the lentiCRISPRv2 system (gift of F. Zheng, Addgene plasmid #52961).  
504 Scramble guideRNA (gRNA) (GCACTACCAGAGCTAACTCA) and NOTCH2 gRNA  
505 (GGCGCTCTGGCTGTGCTGCG) were designed using the Optimized CRISPR Design  
506 tool (F. Zheng, MIT) and cloned into the BsmBI site of plentiCRISPRv2. gRNA-containing  
507 pLentiCRISPR plasmids were co-transfected with pVSVG, pRSV-REV, and pMDL  
508 packaging plasmids into HEK-293T cells using calcium phosphate transfection. After 48  
509 hours, viral supernatants were collected, concentrated using PEG-IT viral precipitator  
510 (SBI), and resuspended in PBS. Cells were transduced in growth medium overnight and  
511 selected with 2 µg/ml puromycin 48 h after infection. CRISPR modifications were verified  
512 by western blot.

513  
514 **Western and Immunoblotting.** Cell lysates were prepared with equal amounts of total  
515 protein (as measured using the Pierce Coomassie protein assay reagent) and separated  
516 on a NuPage Bis-Tris gels, transferred to PVDF (ThermoFisher), blocked in 5% milk and  
517 subjected to Western blot analysis using antibodies for Notch2 (Cell Signaling, D76A6)  
518 and GAPDH (Cell Signaling, D16H11). The blots were developed using ECL Western blot  
519 detection reagents (Pierce), and the signal was detected on iBright™ CL1500 Imaging  
520 System (ThermoFisher).

521

522 **Quantification and Statistical Analysis.** All statistical analysis was performed in  
523 GraphPad (Prism 9.0). Statistical significance was determined via methods outlined in  
524 the figure legends.

525

526

527  
528  
529  
530

## REFERENCES:

- 531 1. Song, H. G., Lammers, A., Sundaram, S., Rubio, L., Chen, A. X., Li, L., Eyckmans, J., Bhatia,  
532 S. N., & Chen, C. S. (2020). Transient Support from Fibroblasts is Sufficient to Drive  
533 Functional Vascularization in Engineered Tissues. *Advanced Functional Materials*, 30(48),  
534 2003777. <https://doi.org/10.1002/adfm.202003777>
- 535 2. Stevens, K. R., Ungrin, M. D., Schwartz, R. E., Ng, S., Carvalho, B., Christine, K. S.,  
536 Chaturvedi, R. R., Li, C. Y., Zandstra, P. W., Chen, C. S., & Bhatia, S. N. (2013). InVERT  
537 molding for scalable control of tissue microarchitecture. *Nature Communications*, 4(1), 1847.  
538 <https://doi.org/10.1038/ncomms2853>
- 539 3. Stevens, K. R., Scull, M. A., Ramanan, V., Fortin, C. L., Chaturvedi, R. R., Knouse, K. A.,  
540 Xiao, J. W., Fung, C., Mirabella, T., Chen, A. X., McCue, M. G., Yang, M. T., Fleming, H.  
541 E., Chung, K., Jong, Y. P. de, Chen, C. S., Rice, C. M., & Bhatia, S. N. (2017). In situ  
542 expansion of engineered human liver tissue in a mouse model of chronic liver disease.  
543 *Science Translational Medicine*, 9(399), eaah5505.  
544 <https://doi.org/10.1126/scitranslmed.aah5505>
- 545 4. Baranski, J. D., Chaturvedi, R. R., Stevens, K. R., Eyckmans, J., Carvalho, B., Solorzano, R.  
546 D., Yang, M. T., Miller, J. S., Bhatia, S. N., & Chen, C. S. (2013). Geometric control of  
547 vascular networks to enhance engineered tissue integration and function. *Proceedings of the*  
548 *National Academy of Sciences*, 110(19), 7586–7591.  
549 <https://doi.org/10.1073/pnas.1217796110>
- 550 5. Vroman, B., & LaRusso, N. F. (1996). Development and characterization of polarized primary  
551 cultures of rat intrahepatic bile duct epithelial cells. *Laboratory Investigation; a Journal of*  
552 *Technical Methods and Pathology*, 74(1), 303–313.
- 553 6. Tabibian, J. H., Trussoni, C. E., O'Hara, S. P., Splinter, P. L., Heimbach, J. K., & LaRusso, N.  
554 F. (2014). Characterization of cultured cholangiocytes isolated from livers of patients with  
555 primary sclerosing cholangitis. *Laboratory Investigation*, 94(10), 1126–1133.  
556 <https://doi.org/10.1038/labinvest.2014.94>
- 557 7. Loarca, L., Assuncao, T. M. D., Jalan-Sakrikar, N., Bronk, S., Krishnan, A., Huang, B.,  
558 Morton, L., Trussoni, C., Bonilla, L. M., Krueger, E., O'Hara, S., Splinter, P., Shi, G.,  
559 Pisarello, M. J. L., Gores, G. J., Huebert, R. C., & LaRusso, N. F. (2017). Development and  
560 characterization of cholangioids from normal and diseased human cholangiocytes as an in  
561 vitro model to study primary sclerosing cholangitis. *Laboratory Investigation*, 97(11), 1385–  
562 1396. <https://doi.org/10.1038/labinvest.2017.63>
- 563 8. Huch, M., Dorrell, C., Boj, S. F., Es, J. H. van, Li, V. S. W., Wetering, M. van de, Sato, T.,  
564 Hamer, K., Sasaki, N., Finegold, M. J., Haft, A., Vries, R. G., Grompe, M., & Clevers, H.

- 565 (2013). In vitro expansion of single Lgr5+ liver stem cells induced by Wnt-driven  
566 regeneration. *Nature*, 494(7436), 247–250. <https://doi.org/10.1038/nature11826>
- 567 9. Huch, M., Gehart, H., van Boxtel, R., Hamer, K., Blokzijl, F., Verstegen, M. M. A., Ellis, E.,  
568 van Wenum, M., Fuchs, S. A., de Ligt, J., van de Wetering, M., Sasaki, N., Boers, S. J.,  
569 Kemperman, H., de Jonge, J., Ijzermans, J. N. M., Nieuwenhuis, E. E. S., Hoekstra, R.,  
570 Strom, S., ... Clevers, H. (2015). Long-Term Culture of Genome-Stable Bipotent Stem Cells  
571 from Adult Human Liver. *Cell*, 160(1–2), 299–312. <https://doi.org/10.1016/j.cell.2014.11.050>
- 572 10. Sampaziotis, F., Brito, M. C. de, Geti, I., Bertero, A., Hannan, N. R., & Vallier, L. (2017).  
573 Directed differentiation of human induced pluripotent stem cells into functional  
574 cholangiocyte-like cells. *Nature Protocols*, 12(4), 814–827.  
575 <https://doi.org/10.1038/nprot.2017.011>
- 576 11. Tysoe, O. C., Justin, A. W., Brevini, T., Chen, S. E., Mahbubani, K. T., Frank, A. K., Zedira,  
577 H., Melum, E., Saeb-Parsy, K., Markaki, A. E., Vallier, L., & Sampaziotis, F. (2019).  
578 Isolation and propagation of primary human cholangiocyte organoids for the generation of  
579 bioengineered biliary tissue. *Nature Protocols*, 14(6), 1884–1925.  
580 <https://doi.org/10.1038/s41596-019-0168-0>
- 581 12. Sampaziotis, F., Justin, A. W., Tysoe, O. C., Sawiak, S., Godfrey, E. M., Upponi, S. S.,  
582 Gieseck, R. L., Brito, M. C. de, Berntsen, N. L., Gómez-Vázquez, M. J., Ortmann, D.,  
583 Yiangou, L., Ross, A., Bargehr, J., Bertero, A., Zonneveld, M. C. F., Pedersen, M. T.,  
584 Pawlowski, M., Valestrand, L., ... Vallier, L. (2017). Reconstruction of the mouse  
585 extrahepatic biliary tree using primary human extrahepatic cholangiocyte organoids. *Nature*  
586 *Medicine*, 23(8), 954–963. <https://doi.org/10.1038/nm.4360>
- 587 13. Ishii, M., Vroman, B., & LaRusso, N. F. (1989). Isolation and morphologic characterization  
588 of bile duct epithelial cells from normal rat liver. *Gastroenterology*, 97(5), 1236–1247.  
589 [https://doi.org/10.1016/0016-5085\(89\)91695-8](https://doi.org/10.1016/0016-5085(89)91695-8)
- 590 14. Tian, L., Deshmukh, A., Ye, Z., & Jang, Y.-Y. (2016). Efficient and Controlled Generation  
591 of 2D and 3D Bile Duct Tissue from Human Pluripotent Stem Cell-Derived Spheroids. *Stem*  
592 *Cell Reviews and Reports*, 12(4), 500–508. <https://doi.org/10.1007/s12015-016-9657-5>
- 593 15. McAteer, J. A., Evan, A. P., & Gardner, K. D. (1987). Morphogenetic clonal growth of  
594 kidney epithelial cell line MDCK. *The Anatomical Record*, 217(3), 229–239.  
595 <https://doi.org/10.1002/ar.1092170303>
- 596 16. Tanimizu, N., Miyajima, A., & Mostov, K. E. (2007). Liver Progenitor Cells Develop  
597 Cholangiocyte-Type Epithelial Polarity in Three-dimensional Culture. *Molecular Biology of*  
598 *the Cell*, 18(4), 1472–1479. <https://doi.org/10.1091/mbc.e06-09-0848>
- 599 17. Lewis, P. L., Su, J., Yan, M., Meng, F., Glaser, S. S., Alpini, G. D., Green, R. M., Sosa-  
600 Pineda, B., & Shah, R. N. (2018). Complex bile duct network formation within liver



- 601 decellularized extracellular matrix hydrogels. *Scientific Reports*, 8(1), 12220.  
602 <https://doi.org/10.1038/s41598-018-30433-6>
- 603 18. Funfak, A., Bouzahir, L., Gontran, E., Minier, N., Dupuis-Williams, P., & Gobaa, S. (2019).  
604 Biophysical Control of Bile Duct Epithelial Morphogenesis in Natural and Synthetic  
605 Scaffolds. *Frontiers in Bioengineering and Biotechnology*, 7, 417.  
606 <https://doi.org/10.3389/fbioe.2019.00417>
- 607 19. Du, Y., Khandekar, G., Llewellyn, J., Polacheck, W., Chen, C. S., & Wells, R. G. (2020). A  
608 Bile Duct-on-a-Chip With Organ-Level Functions. *Hepatology*, 71(4), 1350–1363.  
609 <https://doi.org/10.1002/hep.30918>
- 610 20. Chen, C., Jochems, P. G. M., Salz, L., Schneeberger, K., Penning, L. C., Graaf, S. F. J. van  
611 de, Beuers, U., Clevers, H., Geijsen, N., Masereeuw, R., & Spee, B. (2018). Bioengineered  
612 bile ducts recapitulate key cholangiocyte functions. *Biofabrication*, 10(3), 034103.  
613 <https://doi.org/10.1088/1758-5090/aac8fd>
- 614 21. McGill, M. R., Williams, C. D., Xie, Y., Ramachandran, A., & Jaeschke, H. (2012).  
615 Acetaminophen-induced liver injury in rats and mice: Comparison of protein adducts,  
616 mitochondrial dysfunction, and oxidative stress in the mechanism of toxicity. *Toxicology and  
617 Applied Pharmacology*, 264(3), 387–394. <https://doi.org/10.1016/j.taap.2012.08.015>
- 618 22. Blais, E. M., Rawls, K. D., Dougherty, B. V., Li, Z. I., Kolling, G. L., Ye, P., Wallqvist, A.,  
619 & Papin, J. A. (2017). Reconciled rat and human metabolic networks for comparative  
620 toxicogenomics and biomarker predictions. *Nature Communications*, 8(1), 14250.  
621 <https://doi.org/10.1038/ncomms14250>
- 622 23. Martignoni, M., Groothuis, G. M. M., & Kanter, R. de. (2006). Species differences between  
623 mouse, rat, dog, monkey and human CYP-mediated drug metabolism, inhibition and  
624 induction. *Expert Opinion on Drug Metabolism & Toxicology*, 2(6), 875–894.  
625 <https://doi.org/10.1517/17425255.2.6.875>
- 626 24. Liu, Y., Meyer, C., Xu, C., Weng, H., Hellerbrand, C., Dijke, P. ten, & Dooley, S. (2013).  
627 Animal models of chronic liver diseases. *American Journal of Physiology-Gastrointestinal  
628 and Liver Physiology*, 304(5), G449–G468. <https://doi.org/10.1152/ajpgi.00199.2012>
- 629 25. Odom, D. T., Dowell, R. D., Jacobsen, E. S., Gordon, W., Danford, T. W., MacIsaac, K. D.,  
630 Rolfe, P. A., Conboy, C. M., Gifford, D. K., & Fraenkel, E. (2007). Tissue-specific  
631 transcriptional regulation has diverged significantly between human and mouse. *Nature  
632 Genetics*, 39(6), 730–732. <https://doi.org/10.1038/ng2047>
- 633 26. Khetani, S. R., Berger, D. R., Ballinger, K. R., Davidson, M. D., Lin, C., & Ware, B. R.  
634 (2014). Microengineered Liver Tissues for Drug Testing. *Journal of Laboratory Automation*,  
635 20(3), 216–250. <https://doi.org/10.1177/2211068214566939>

- 636 27. Trappmann, B., Baker, B. M., Polacheck, W. J., Choi, C. K., Burdick, J. A., & Chen, C. S.  
637 (2017). Matrix degradability controls multicellularity of 3D cell migration. *Nature*  
638 *Communications*, 8(1), 371. <https://doi.org/10.1038/s41467-017-00418-6>
- 639 28. Nguyen, D.-H. T., Lee, E., Alimperti, S., Norgard, R. J., Wong, A., Lee, J. J.-K., Eyckmans,  
640 J., Stanger, B. Z., & Chen, C. S. (2019). A biomimetic pancreatic cancer on-chip reveals  
641 endothelial ablation via ALK7 signaling. *Science Advances*, 5(8), eaav6789.  
642 <https://doi.org/10.1126/sciadv.aav6789>
- 643 29. Guan, Y., Xu, D., Garfin, P. M., Ehmer, U., Hurwitz, M., Enns, G., Michie, S., Wu, M.,  
644 Zheng, M., Nishimura, T., Sage, J., & Peltz, G. (2017). Human hepatic organoids for the  
645 analysis of human genetic diseases. *JCI Insight*, 2(17).  
646 <https://doi.org/10.1172/jci.insight.94954>
- 647 30. Sampaziotis, F., Brito, M. C. de, Madrigal, P., Bertero, A., Saeb-Parsy, K., Soares, F. A. C.,  
648 Schrupf, E., Melum, E., Karlsen, T. H., Bradley, J. A., Gelson, W. T. H., Davies, S., Baker,  
649 A., Kaser, A., Alexander, G. J., Hannan, N. R. F., & Vallier, L. (2015). Cholangiocytes  
650 derived from human induced pluripotent stem cells for disease modeling and drug validation.  
651 *Nature Biotechnology*, 33(8), 845–852. <https://doi.org/10.1038/nbt.3275>
- 652 31. Ogawa, M., Ogawa, S., Bear, C. E., Ahmadi, S., Chin, S., Li, B., Grompe, M., Keller, G.,  
653 Kamath, B. M., & Ghanekar, A. (2015). Directed differentiation of cholangiocytes from  
654 human pluripotent stem cells. *Nature Biotechnology*, 33(8), 853–861.  
655 <https://doi.org/10.1038/nbt.3294>
- 656 32. Glaser, S. S., Gaudio, E., Rao, A., Pierce, L. M., Onori, P., Franchitto, A., Francis, H. L.,  
657 Dostal, D. E., Venter, J. K., DeMorrow, S., Mancinelli, R., Carpino, G., Alvaro, D., Kopriva,  
658 S. E., Savage, J. M., & Alpini, G. D. (2009). Morphological and functional heterogeneity of  
659 the mouse intrahepatic biliary epithelium. *Laboratory Investigation*, 89(4), 456–469.  
660 <https://doi.org/10.1038/labinvest.2009.6>
- 661 33. Tian, G., Sobotka-Briner, C. D., Zysk, J., Liu, X., Birr, C., Sylvester, M. A., Edwards, P. D.,  
662 Scott, C. D., & Greenberg, B. D. (2002). Linear Non-competitive Inhibition of Solubilized  
663 Human  $\gamma$ -Secretase by Pepstatin A Methyl Ester, L685458, Sulfonamides, and  
664 Benzodiazepines. *Journal of Biological Chemistry*, 277(35), 31499–31505.  
665 <https://doi.org/10.1074/jbc.m112328200>
- 666 34. Alimperti, S., Mirabella, T., Bajaj, V., Polacheck, W., Pirone, D. M., Duffield, J., Eyckmans,  
667 J., Assoian, R. K., & Chen, C. S. (2017). Three-dimensional biomimetic vascular model  
668 reveals a RhoA, Rac1, and N-cadherin balance in mural cell–endothelial cell-regulated barrier  
669 function. *Proceedings of the National Academy of Sciences*, 114(33), 8758–8763.  
670 <https://doi.org/10.1073/pnas.1618333114>
- 671 35. Bhatia, S. N., Underhill, G. H., Zaret, K. S., & Fox, I. J. (2014). Cell and tissue engineering  
672 for liver disease. *Science Translational Medicine*, 6(245), 245sr2-245sr2.  
673 <https://doi.org/10.1126/scitranslmed.3005975>

- 674 36. Stevens, K. R., Scull, M. A., Ramanan, V., Fortin, C. L., Chaturvedi, R. R., Knouse, K. A.,  
675 Xiao, J. W., Fung, C., Mirabella, T., Chen, A. X., McCue, M. G., Yang, M. T., Fleming, H.  
676 E., Chung, K., Jong, Y. P. de, Chen, C. S., Rice, C. M., & Bhatia, S. N. (2017). In situ  
677 expansion of engineered human liver tissue in a mouse model of chronic liver disease.  
678 *Science Translational Medicine*, 9(399), eaah5505.  
679 <https://doi.org/10.1126/scitranslmed.aah5505>
- 680 37. Zong, Y., Panikkar, A., Xu, J., Antoniou, A., Raynaud, P., Lemaigre, F., & Stanger, B. Z.  
681 (2009). Notch signaling controls liver development by regulating biliary differentiation.  
682 *Development*, 136(10), 1727–1739. <https://doi.org/10.1242/dev.029140>
- 683 38. Hofmann, J. J., Zovein, A. C., Koh, H., Radtke, F., Weinmaster, G., & Iruela-Arispe, M. L.  
684 (2010). Jagged1 in the portal vein mesenchyme regulates intrahepatic bile duct development:  
685 insights into Alagille syndrome. *Development*, 137(23), 4061–4072.  
686 <https://doi.org/10.1242/dev.052118>
- 687 39. Kitade, M., Factor, V. M., Andersen, J. B., Tomokuni, A., Kaji, K., Akita, H., Holczbauer,  
688 A., Seo, D., Marquardt, J. U., Conner, E. A., Lee, S.-B., Lee, Y.-H., & Thorgeirsson, S. S.  
689 (2013). Specific fate decisions in adult hepatic progenitor cells driven by MET and EGFR  
690 signaling. *Genes & Development*, 27(15), 1706–1717.  
691 <https://doi.org/10.1101/gad.214601.113>
- 692 40. MICHALOPOULOS, G. K., BOWEN, W. C., MULÈ, K., & LUO, J. (2003). HGF-, EGF-,  
693 and Dexamethasone-Induced Gene Expression Patterns During Formation of Tissue in  
694 Hepatic Organoid Cultures. *Gene Expression*, 11(2), 55–75.  
695 <https://doi.org/10.3727/000000003108748964>
- 696 41. Totaro, A., Castellan, M., Battilana, G., Zanconato, F., Azzolin, L., Giulitti, S., Cordenonsi,  
697 M., & Piccolo, S. (2017). YAP/TAZ link cell mechanics to Notch signalling to control  
698 epidermal stem cell fate. *Nature Communications*, 8(1), 15206.  
699 <https://doi.org/10.1038/ncomms15206>
- 700 42. Kaylan, K. B., Berg, I. C., Biehl, M. J., Brougham-Cook, A., Jain, I., Jamil, S. M., Sargeant,  
701 L. H., Cornell, N. J., Raetzman, L. T., & Underhill, G. H. (2018). Spatial patterning of liver  
702 progenitor cell differentiation mediated by cellular contractility and Notch signaling. *ELife*, 7,  
703 e38536. <https://doi.org/10.7554/elife.38536>
- 704 43. Rimland, C. A., Tilson, S. G., Morell, C. M., Tomaz, R. A., Lu, W., Adams, S. E.,  
705 Georgakopoulos, N., Otaizo-Carrasquero, F., Myers, T. G., Ferdinand, J. R., Gieseck, R. L.,  
706 Sampaziotis, F., Tysoe, O. C., Wesley, B., Muraro, D., Oniscu, G. C., Hannan, N. R., Forbes,  
707 S. J., Saeb-Parsy, K., ... Vallier, L. (2020). Regional differences in human biliary tissues and  
708 corresponding in vitro derived organoids. *Hepatology*. <https://doi.org/10.1002/hep.31252>
- 709 44. Mehta, G., Williams, C. M., Alvarez, L., Lesniewski, M., Kamm, R. D., & Griffith, L. G.  
710 (2010). Synergistic effects of tethered growth factors and adhesion ligands on DNA synthesis

711 and function of primary hepatocytes cultured on soft synthetic hydrogels. *Biomaterials*,  
712 31(17), 4657–4671. <https://doi.org/10.1016/j.biomaterials.2010.01.138>

713

714

715

716

717 **SUPPLEMENTAL FIGURES**

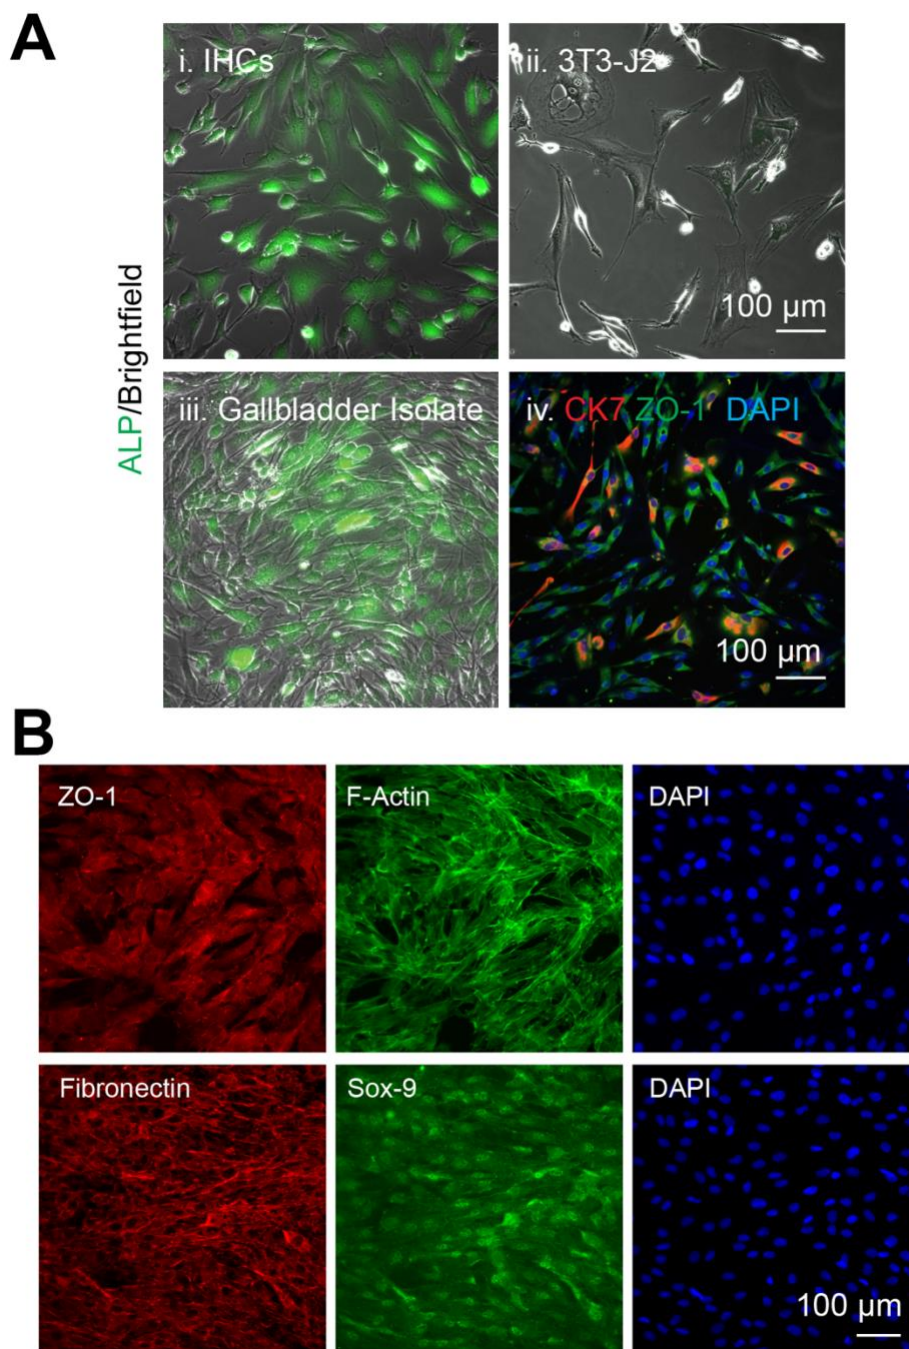

718

719 **Supplementary Figure 1. Characterization of Cholangiocyte Populations.** (A)  
720 Alkaline phosphatase (ALP) uptake comparison between (i) intrahepatic cholangiocytes  
721 (IHCs), (ii) control J2-3T3 mouse fibroblasts and (iii) fresh extrahepatic cholangiocyte  
722 (EHCs) isolates from human gallbladder tissue. (iv) Immunofluorescence staining of fresh  
723 EHCs.

**A**

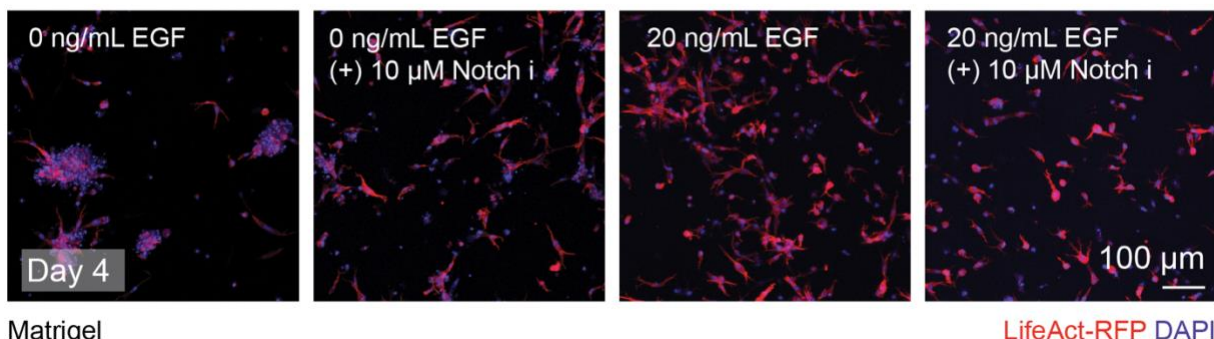

**B**

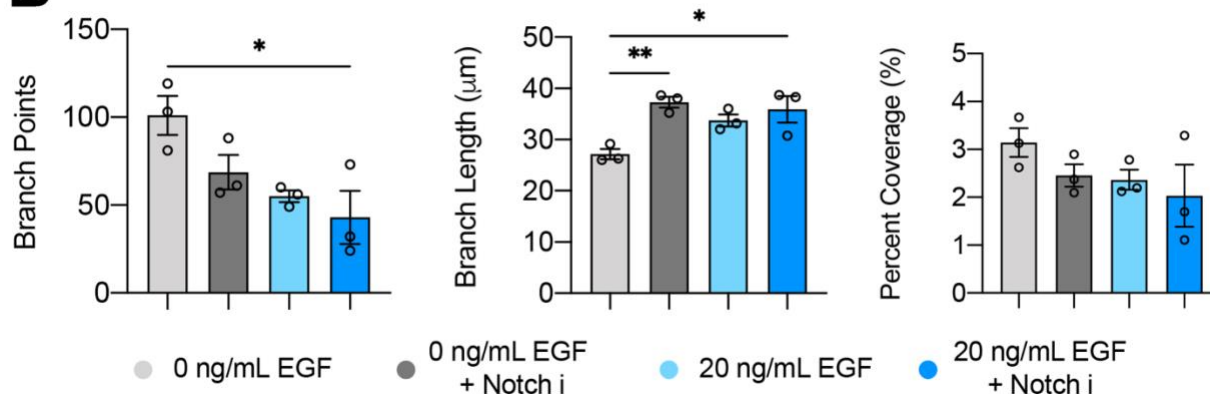

724  
725

726 **Supplemental Figure 2. 3D Culture in Matrigel Does Not Support Cholangiocyte**  
727 **Branching Morphogenesis.** (A) Representative images of LifeAct RFP-IHCs  
728 encapsulated in Matrigel, cultured with and without EGF or Notch inhibition (10  $\mu$ M  
729 L,685,458). (B) Quantification of branch length, points, and network percent coverage.  
730 Image data were generated from at least 3 independent fields of view from 3 biological  
731 replicate experiments. P-values were obtained by a One-Way ANOVA Tukey's  
732 hypothesis test. P < 0.033 (\*), P < 0.002 (\*\*), P < 0.001 (\*\*\*). All data represented as mean  
733  $\pm$  SEM.

734  
735  
736  
737  
738  
739

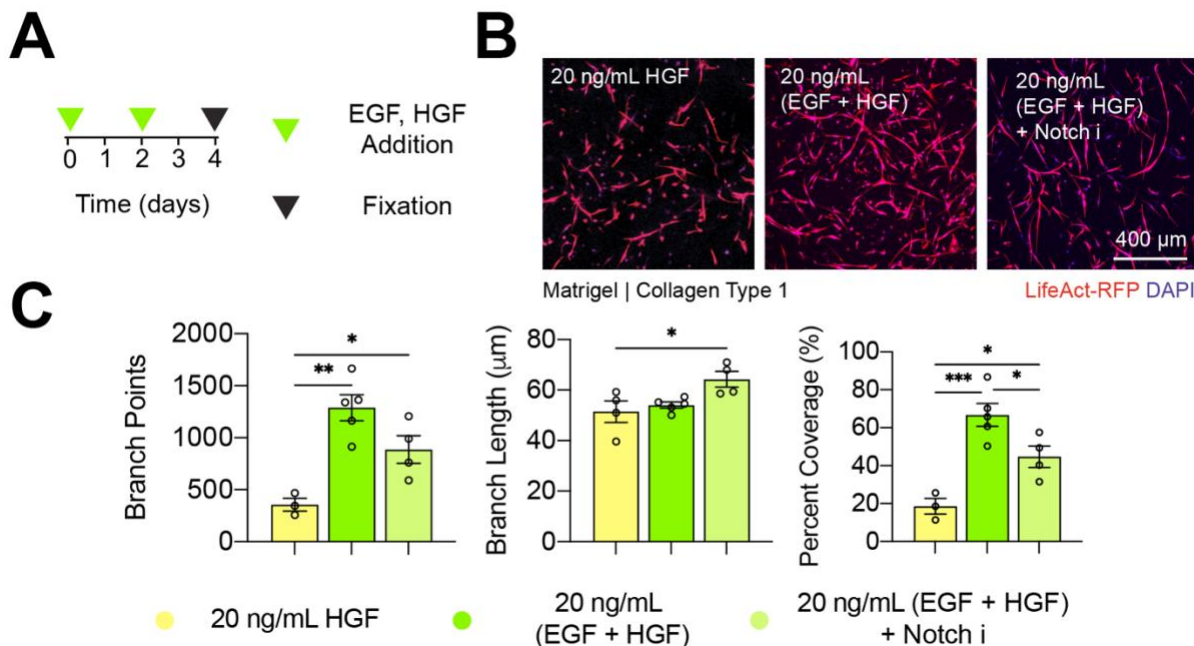

740  
741

742 **Supplemental Figure 3. Hepatocyte Growth Factor (HGF) Supplementation**  
743 **Enhances Cholangiocyte Branching in Matrigel/Collagen Type 1 Hydrogel Blends.**

744 (A) Experimental approach to test the roles of HGF supplementation on IHC-RFP  
745 branching. (B) Representative maximum intensity projection of z-stack confocal images  
746 taken four days post encapsulation. (C) Quantification of percent coverage, major and  
747 minor axis length from at least 3 different fields of view from biological replicate  
748 experiments (n =3). P-values were obtained by a One-Way ANOVA Tukey's hypothesis  
749 test. P < 0.033 (\*), P < 0.002 (\*\*), P < 0.001 (\*\*\*). All data represented as mean ± SEM.

750  
751  
752  
753  
754  
755  
756  
757  
758  
759  
760  
761

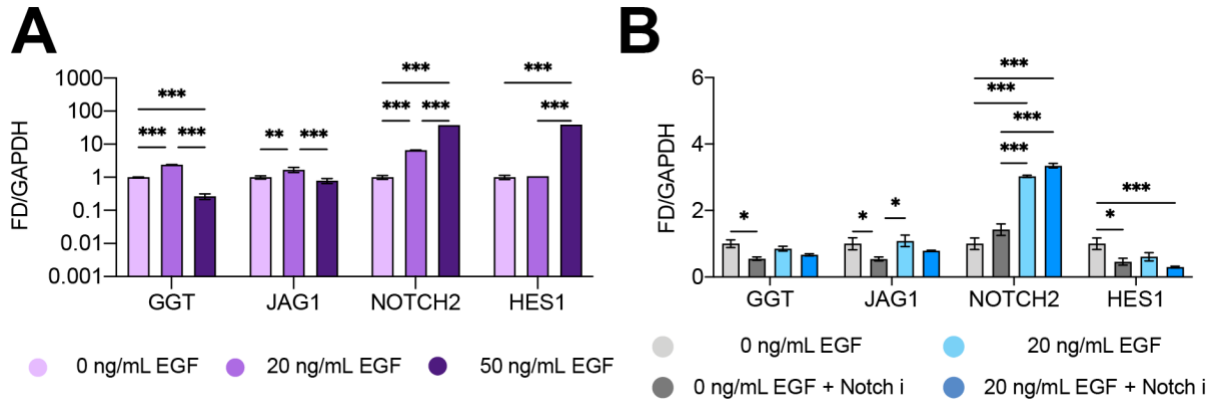

762  
763

764 **Supplemental Figure 4. Effects of EGF Stimulation on Notch Signaling in 2D.** (A)  
765 mRNA expression of *GGT*, *JAG1*, *NOTCH2* and *HES1* of IHCs cultured in the same dose  
766 regiment as 3D cultures (media exchanged every two days) with 0, 20 and 50 ng/mL EGF  
767 stimulation. Data is shown from pooled independent 2D cultures (n = 3 biological  
768 replicates). (B) mRNA expression of the aforementioned genes, of IHCs cultured in 2D,  
769 under 0 and 20 ng/mL EGF stimulation with and without Notch inhibition. Cells were  
770 harvested after 4 days following media exchanges every two days. P-values were  
771 obtained via Two-Way ANOVA Tukey's hypothesis testing. P < 0.033 (\*), P < 0.002 (\*\*),  
772 P < 0.001 (\*\*\*). All data represented as mean ± SEM.

773  
774  
775  
776  
777



**A**

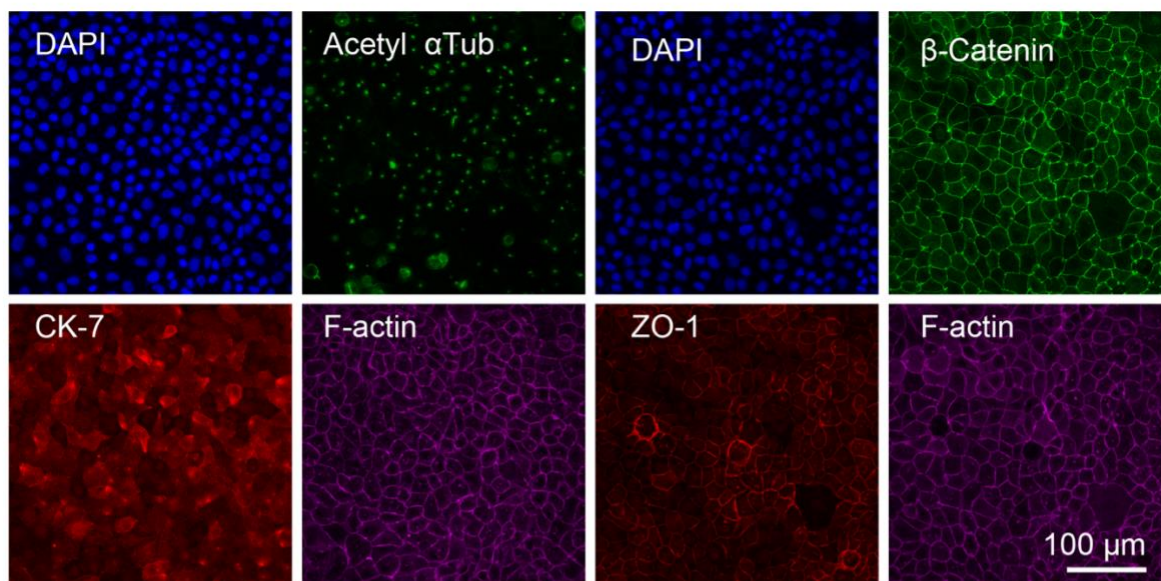

**B**

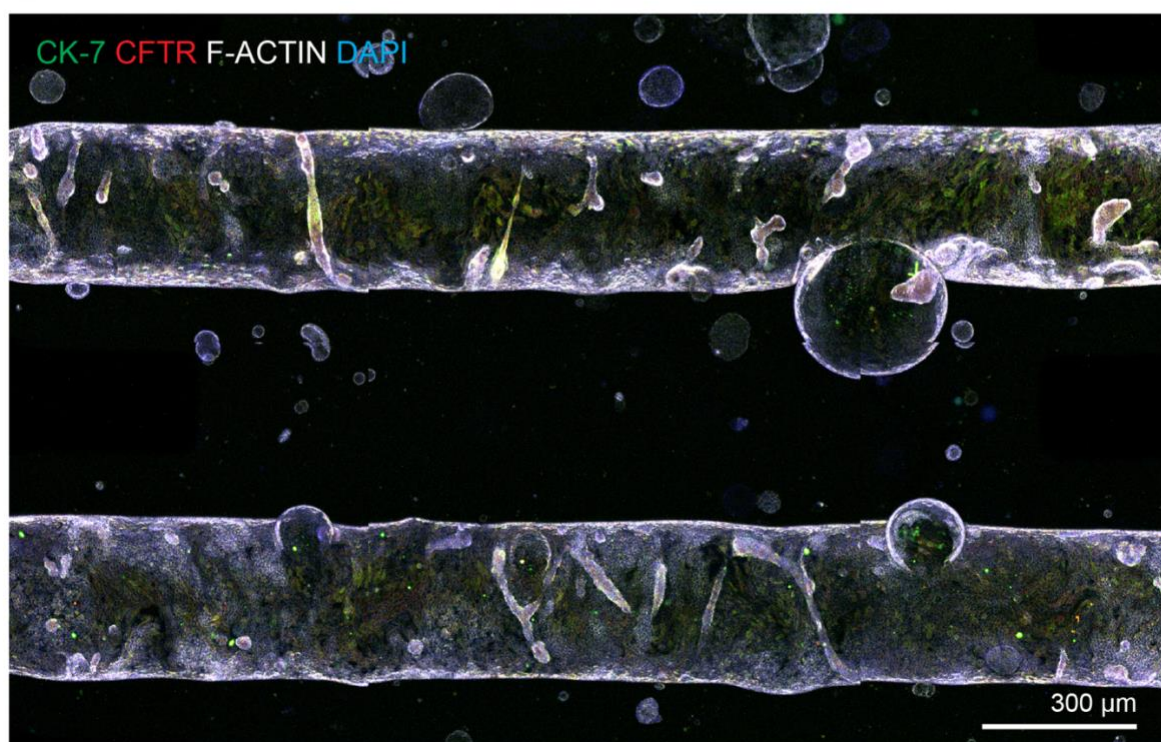

778  
779

780 **Supplementary Figure 5: Microfluidic Culture of Normal Rat Cholangiocytes.** (A)  
781 Immunofluorescence stains of normal rat cholangiocytes (NRCs) cultured in 2D for biliary  
782 (CK-7), primary cilia (acetylated  $\alpha$ -tubulin; Acetyl  $\alpha$ Tub) and junctional markers (ZO-1 and  
783  $\beta$ -catenin). (B) Microfluidic culture of NRCs in the dual microfluidic device.

784 **Supplementary Table 1: Primary and Secondary Antibodies**

785 **Supplementary Table 2: Reagents Used**

786 **Supplementary Table 3: q-RT PCR Primer List**

787

788 **Table S1: Antibodies**

| Primary Antibodies                                             | Source                         | Cat no        | Host Species       | Dilution |
|----------------------------------------------------------------|--------------------------------|---------------|--------------------|----------|
| Cytokeratin-19                                                 | Abcam                          | ab7754        | Mouse              | 1:200    |
| Cytokeratin-7                                                  | Abcam                          | ab181598      | Rabbit             | 1:100    |
| CFTR                                                           | Abcam                          | ab2784        | Mouse              | 1:200    |
| Fibronectin                                                    | Abcam                          | ab2413        | Rabbit             | 1:250    |
| ZO-1                                                           | Invitrogen                     | 40-2200       | Rabbit             | 1:100    |
| $\beta$ -catenin                                               | Cell Signaling                 | L54E2 (2677S) | Mouse              | 1:5      |
| HNF-1 $\beta$                                                  | Santa Cruz Biotechnology       | sc-130407     | Mouse              | 1:200    |
| SOX9                                                           | Santa Cruz Biotechnology       | sc-166505     | Mouse              | 1:200    |
| Alexa Fluor 546                                                | Life Technologies (Eugene, OR) | A11010        | Goat anti-rabbit   | 1:500    |
| Alexa Fluor 546                                                | Life Technologies              | A11003        | Goat anti-mouse    | 1:500    |
| Alexa Fluor 488                                                | Life Technologies              | A21206        | Donkey anti-rabbit | 1:500    |
| Alexa Fluor 647                                                | Life Technologies              | A22287        | Phalloidin         | 1:1000   |
| Cytokeratin 7 Antibody (RCK105) PE                             | Santa Cruz Biotechnology       | sc-23876 PE   | Human              | 1:200    |
| AFP Antibody (C3) Alexa Fluor® 647                             | Santa Cruz Biotechnology       | sc-8399 AF647 | Human              | 1:200    |
| Anti-alpha 1 Antitrypsin antibody [EPR9090] (Alexa Fluor® 647) | Abcam                          | ab206735      | Human              | 1:200    |
| PE Mouse Anti-Human IgG                                        | BD Biosciences                 | 555787        | Human              | 1:200    |
| Alexa Fluor® 647 Mouse IgG1 $\kappa$ Isotype Control           | BD Biosciences                 | 557714        |                    | 1:200    |
| DAPI                                                           | ThermoFisher                   | D1306         |                    | 1:50,000 |

789

790

791

792 **Table S3: Reagents**

| <b>Chemicals, Peptides and Recombinant Proteins</b>                  | <b>Source</b>      | <b>Cat No.</b> |
|----------------------------------------------------------------------|--------------------|----------------|
| Alkaline Phosphatase Live Stain                                      | Life Technologies  | A14353         |
| Rhodamine 123 (100 $\mu$ M)                                          | Sigma-Aldrich      | 83702-10MG     |
| $\gamma$ -Glutamyl Transferase (GGT) Activity Fluorometric Assay Kit | Sigma-Aldrich      | MAK090-1KT     |
| Recombinant Human EGF                                                | R&D                | 236-EG-200     |
| L-685,458 (Notch Inhibitor)                                          | Tocris Biosciences | 2627           |
| rLV-Ubi-LifeAct TagRFP Lentiviral Vectors                            | lbidi              | 60142          |

793

794 **Table S2: Primer Set**

| <b>Primers</b> | <b>Source</b>     | <b>Assay ID</b>   |
|----------------|-------------------|-------------------|
| GGT            | Life Technologies | Hs00980756_m1 FAM |
| JAGGED1        | Life Technologies | Hs01070032_m1 FAM |
| NOTCH2         | Life Technologies | Hs01050702_m1 FAM |
| HES1           | Life Technologies | Hs00172878_m1 FAM |

795

796

797
